# Supplementary material for: A Novel Analytical Strategy to Identify Fusion Transcripts between Repetitive Elements and Protein Coding-Exons Using RNA-Seq
Source: PubMed Central journal article supplement (PMC4945064; doi:10.1371/journal.pone.0159028), 2016-07-14

# S5 Figure

## 4930402H24Rik fusions with LINE

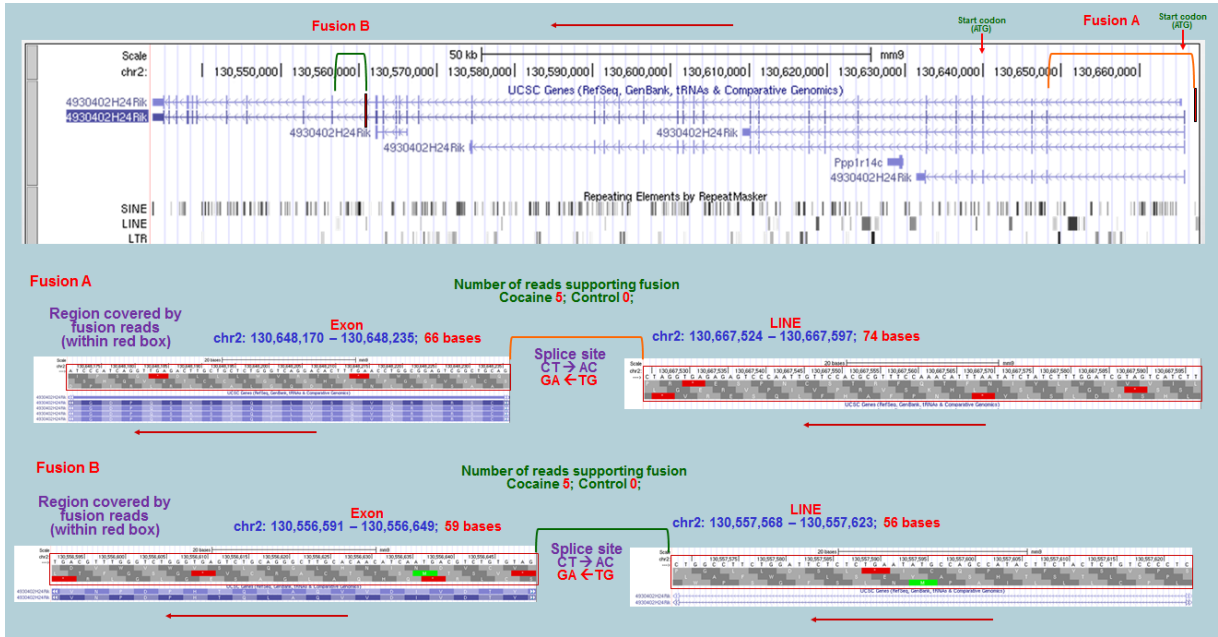

## Atp5l fusion with LINE

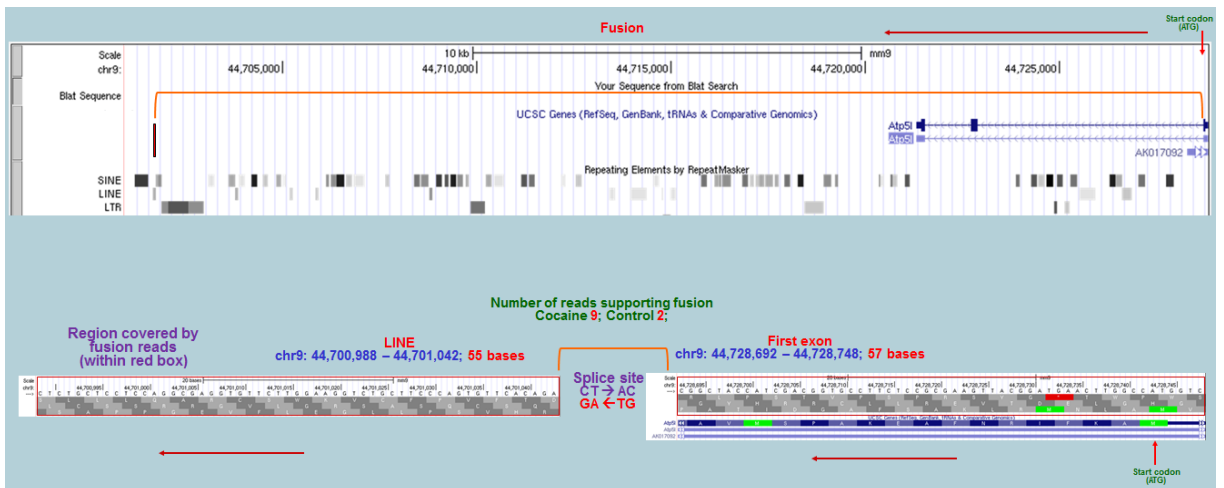

# BC020535 fusions with SINE

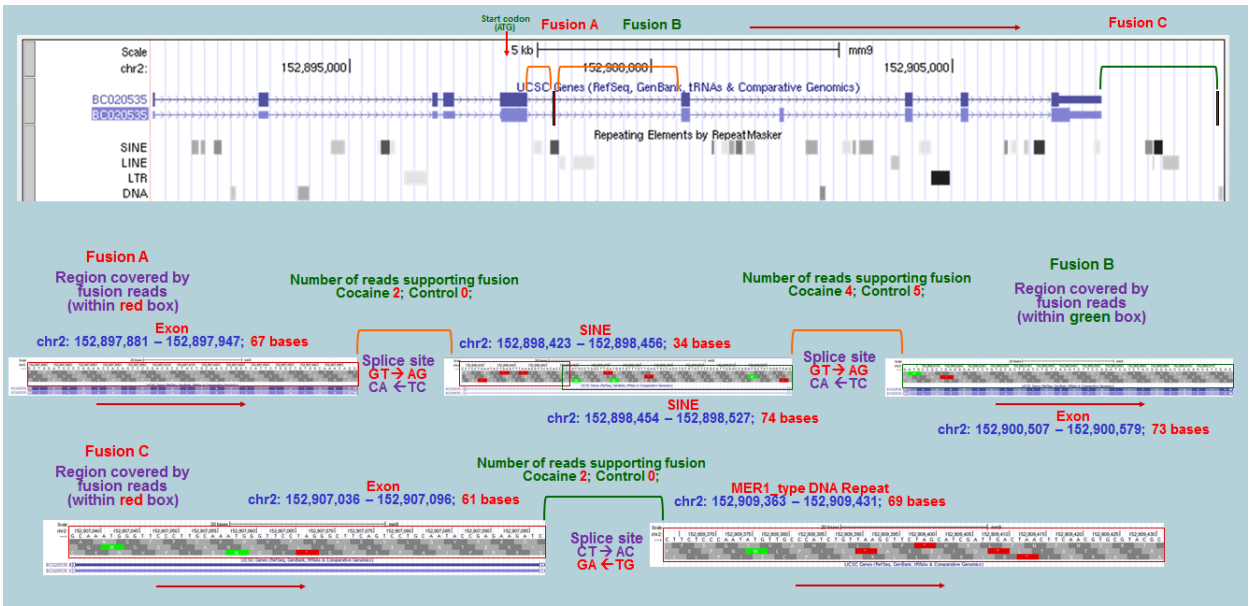

# Ccdc126 fusions with LINE

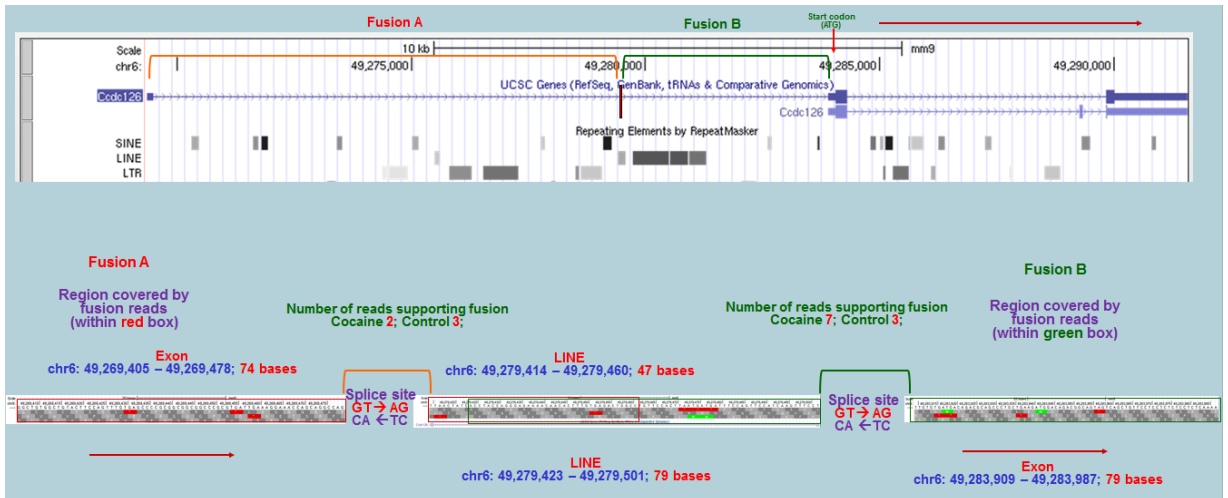

# Cdadc1 fusion with SINE

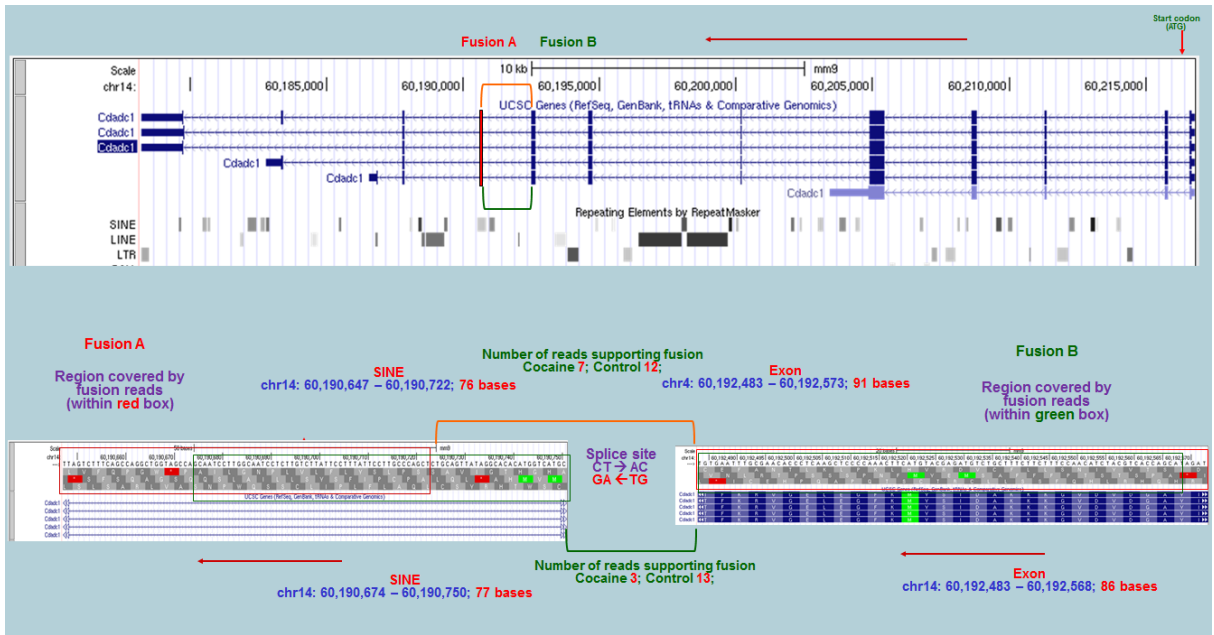

# Celf2 fusion with Simple repeat

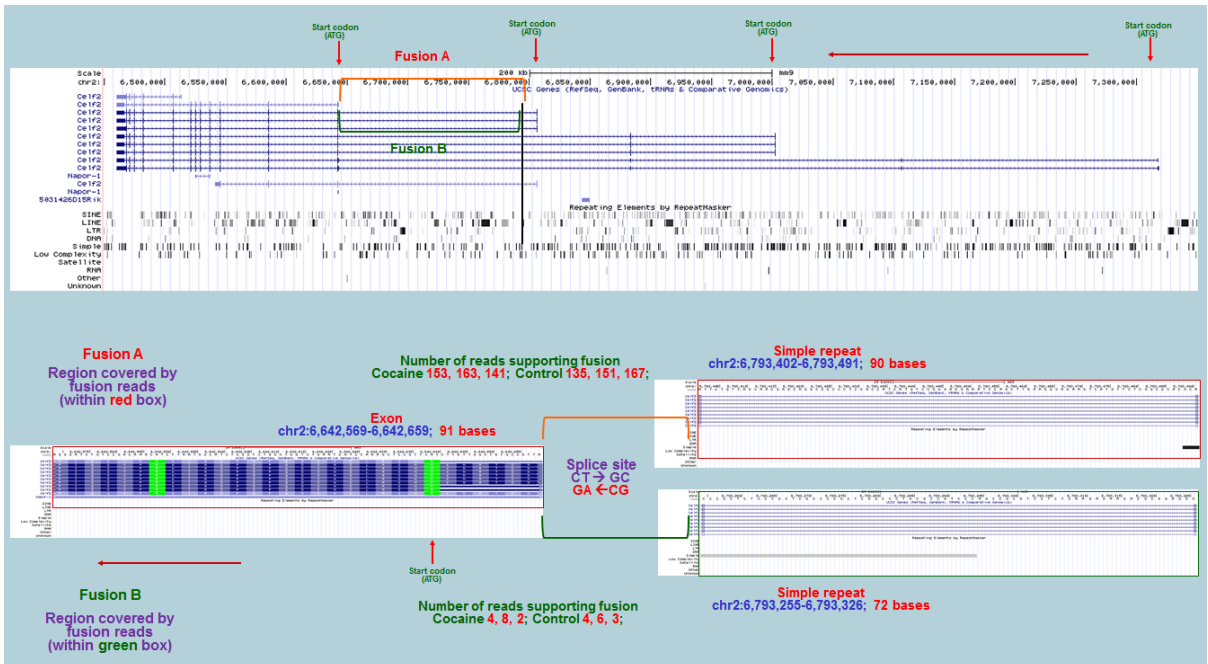

# Ddr2 fusions with SINE

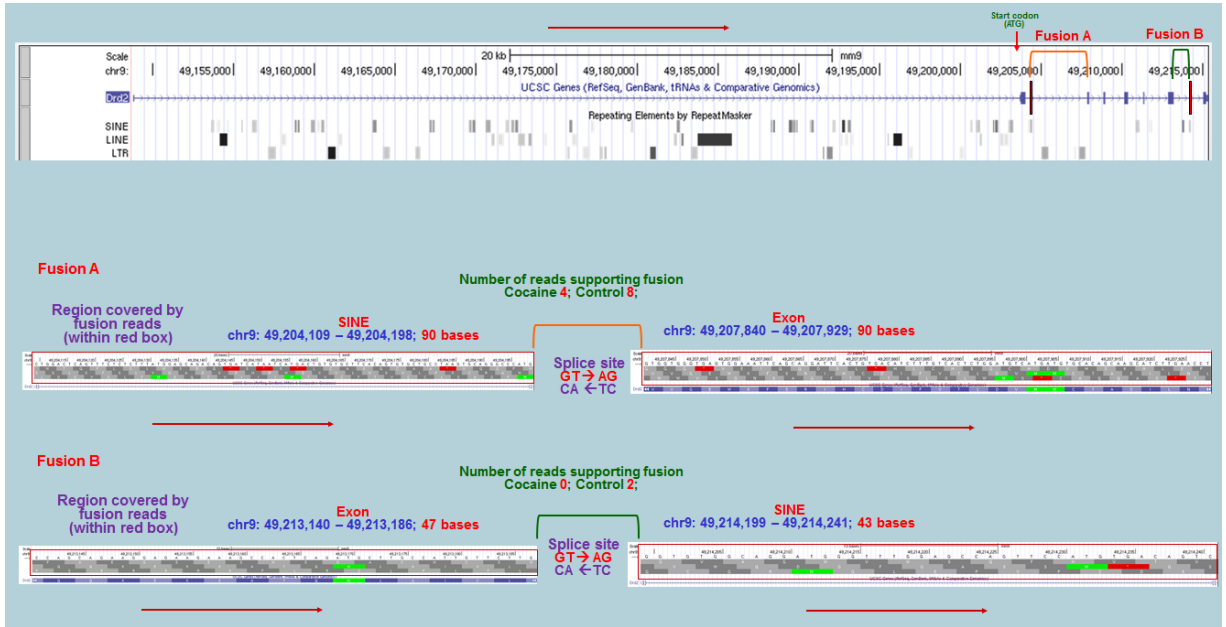

# Dhx34 fusion with SINE

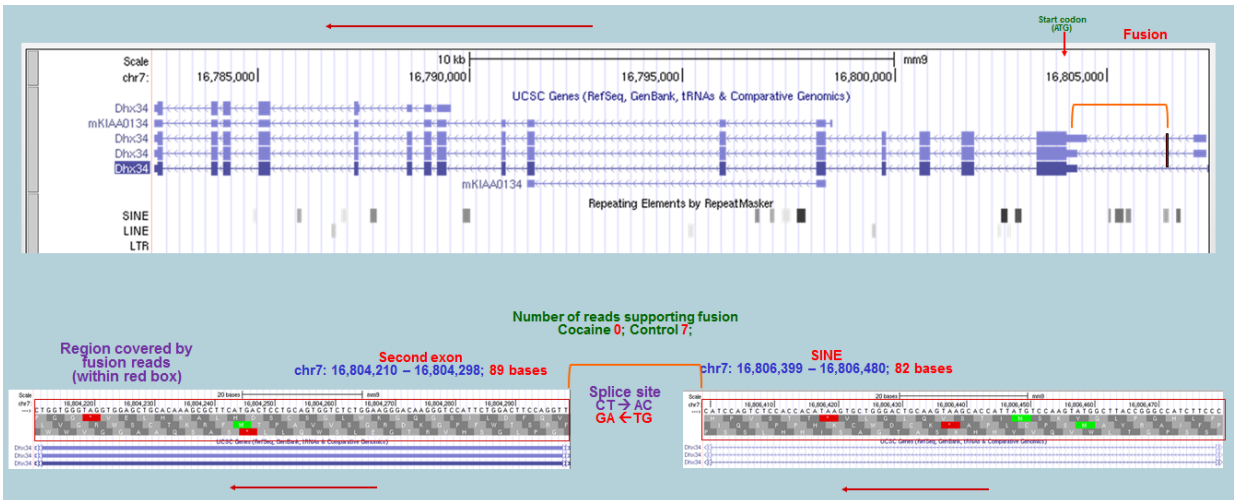

# Elfn2 fusion with LINE

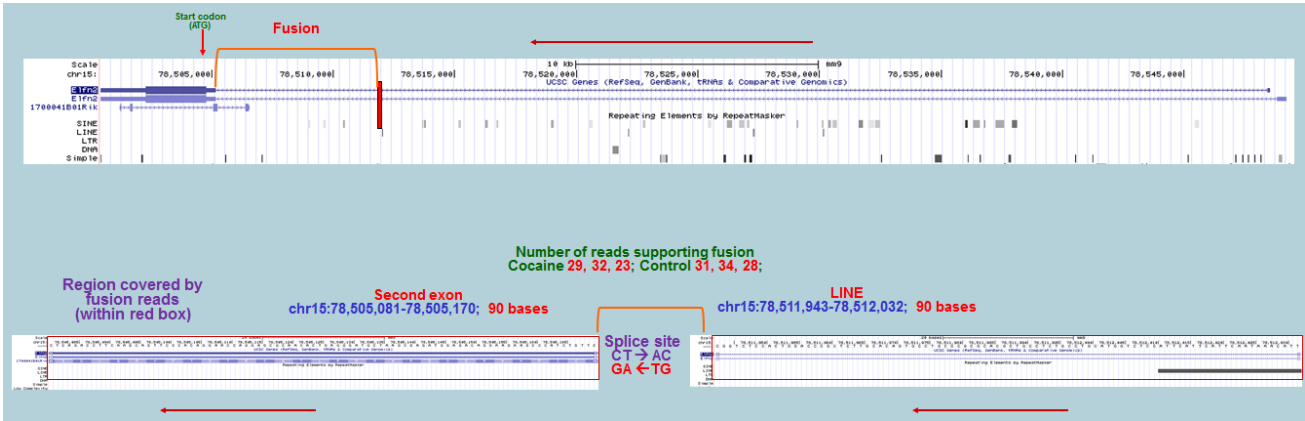

# Fbf1 fusions with SINE

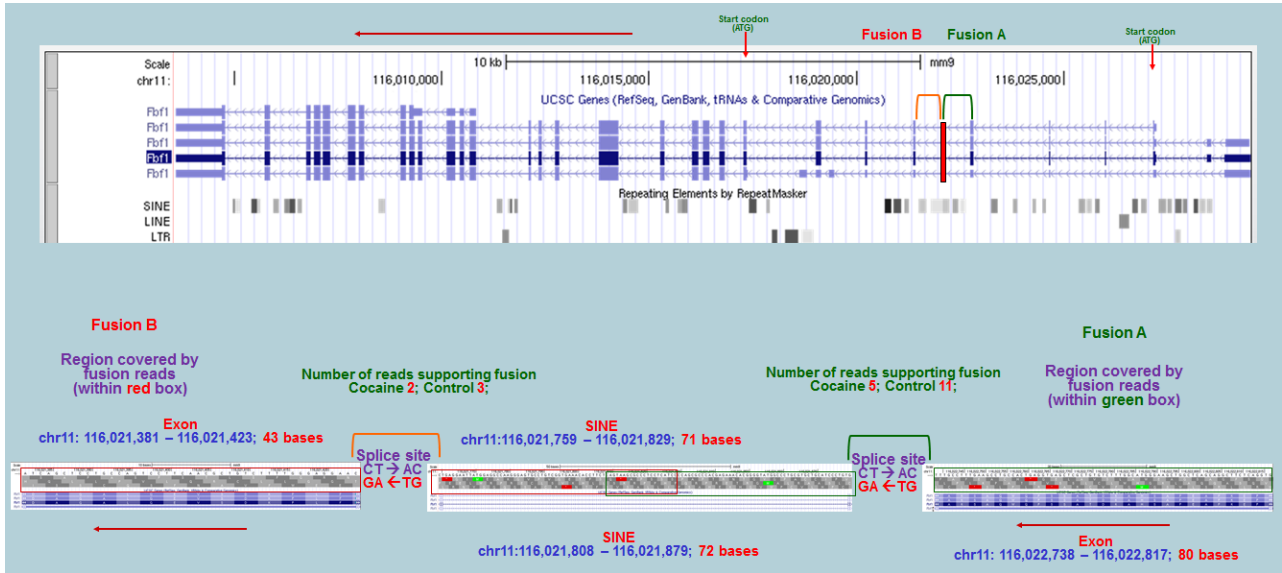

# Foxk2 fusion with SINE

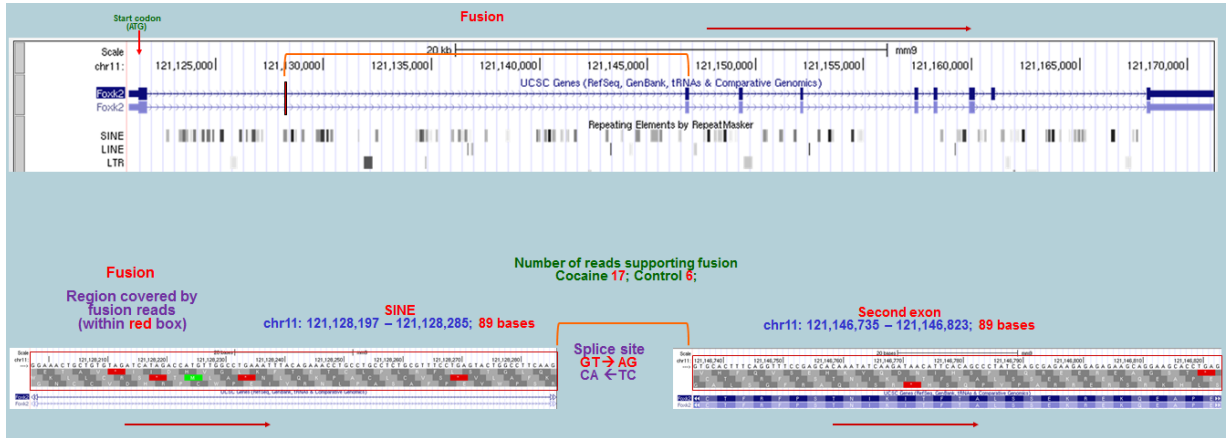

# Fyco1 fusions with SINE

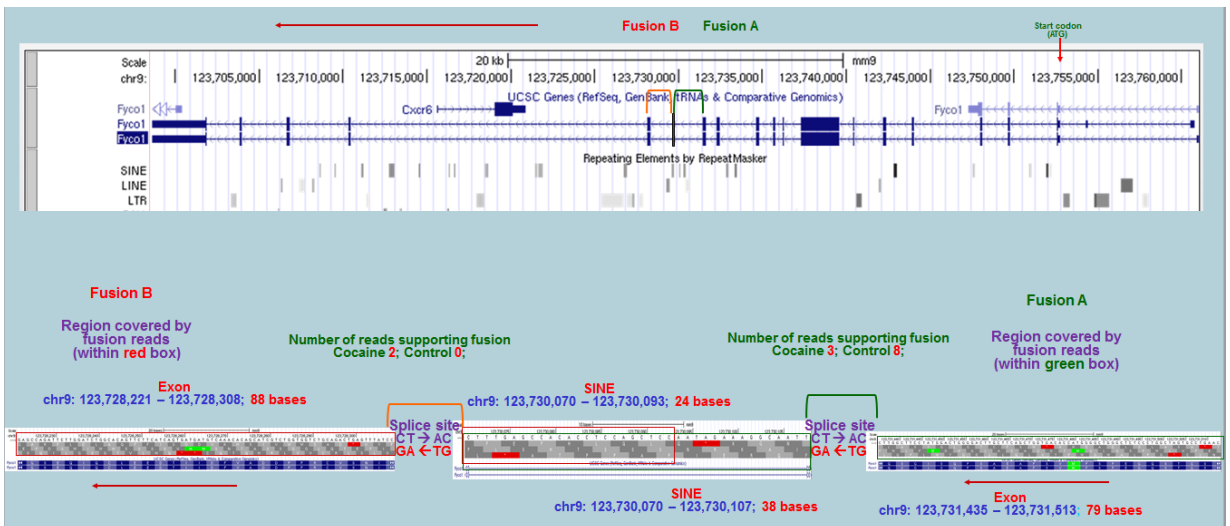

# Gm996 fusion with

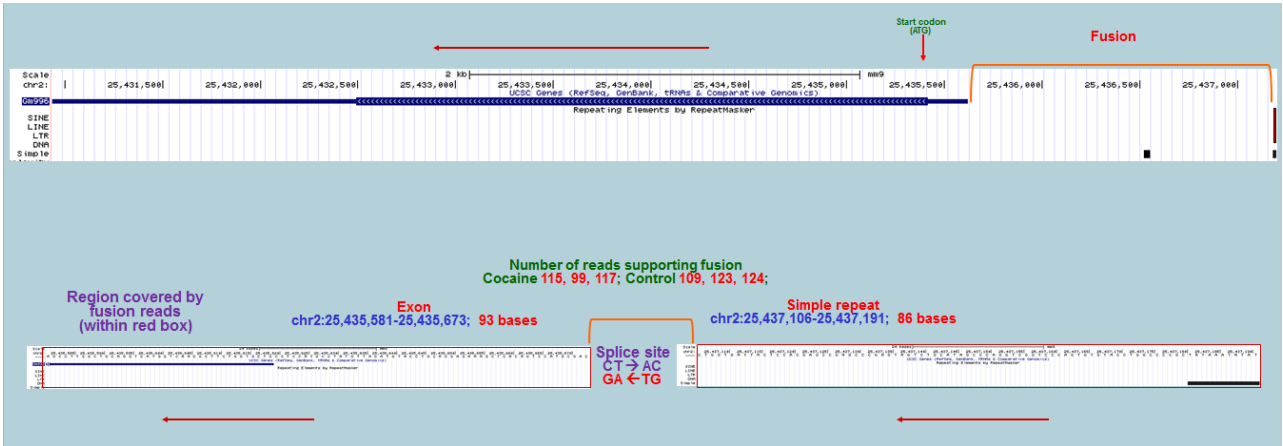

# Hdac7 fusions with low-complexity repeat

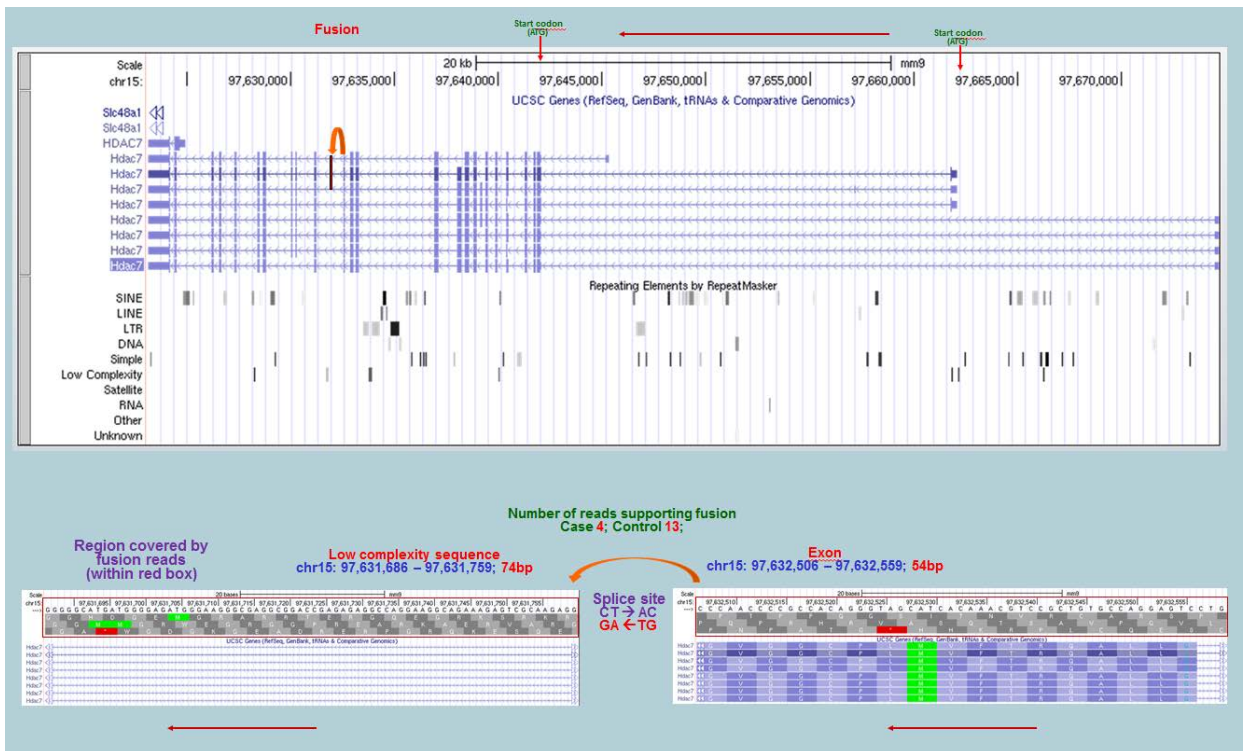

# Idh2 fusions with SINE

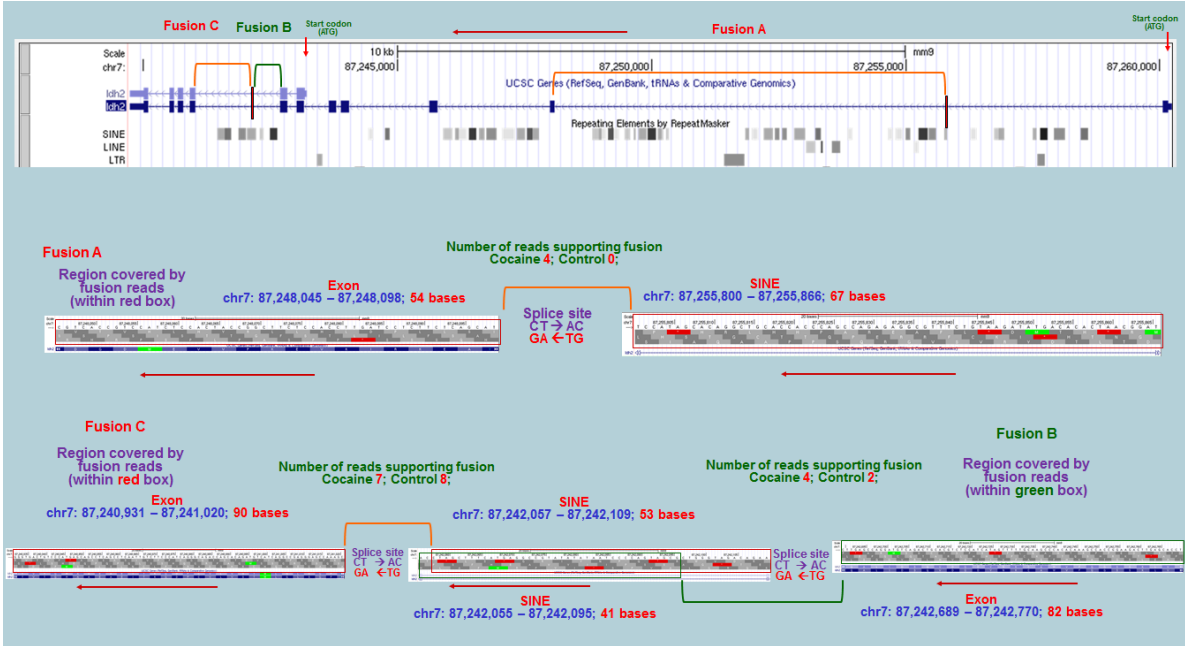

# Kcnab2 fusion with LTR

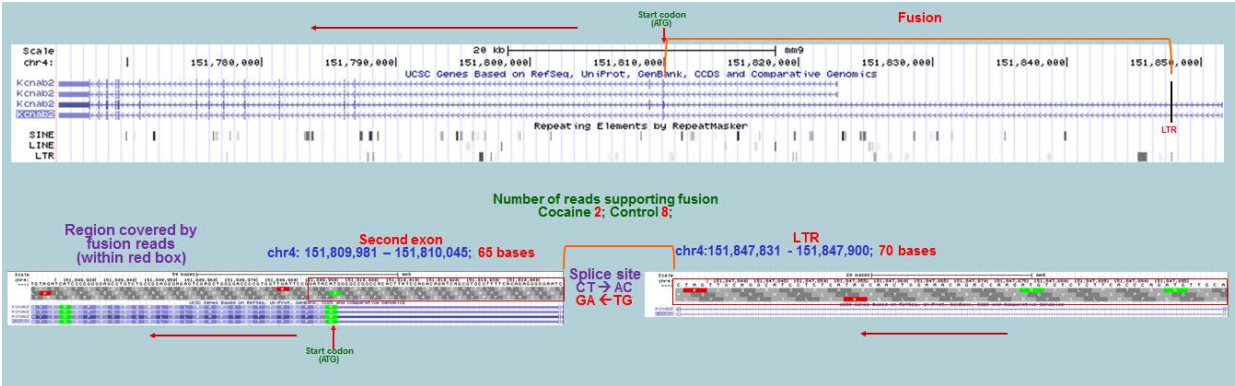



# Kcnmb4 fusion with LTR

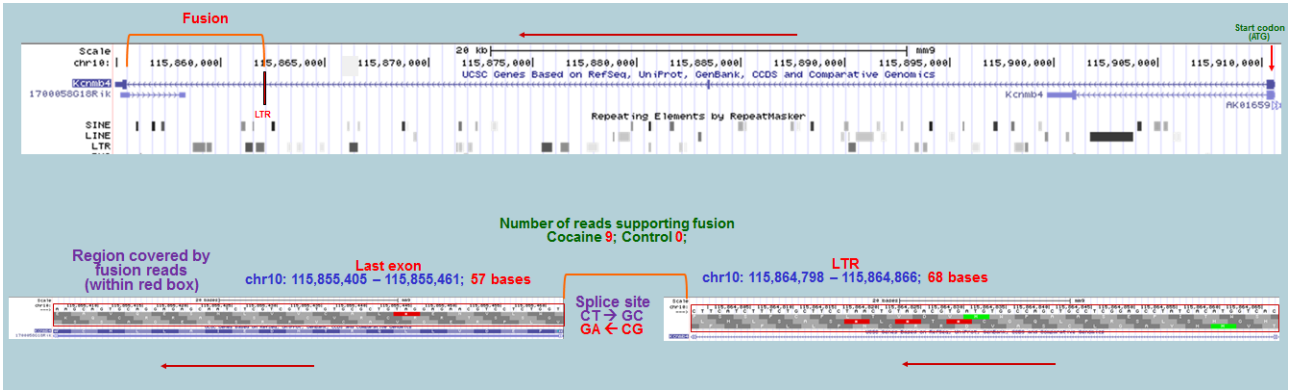

# Klc1 fusion with SINE

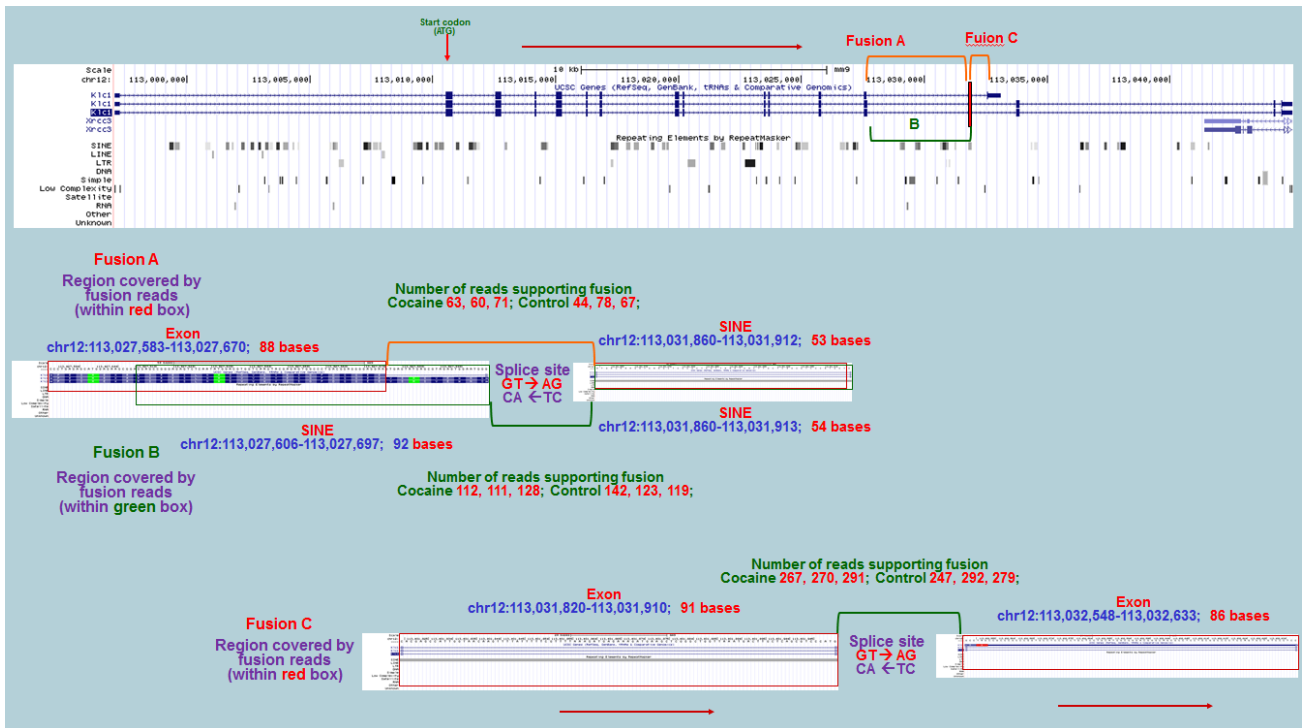

# Macf1 fusion with low-complexity repeat

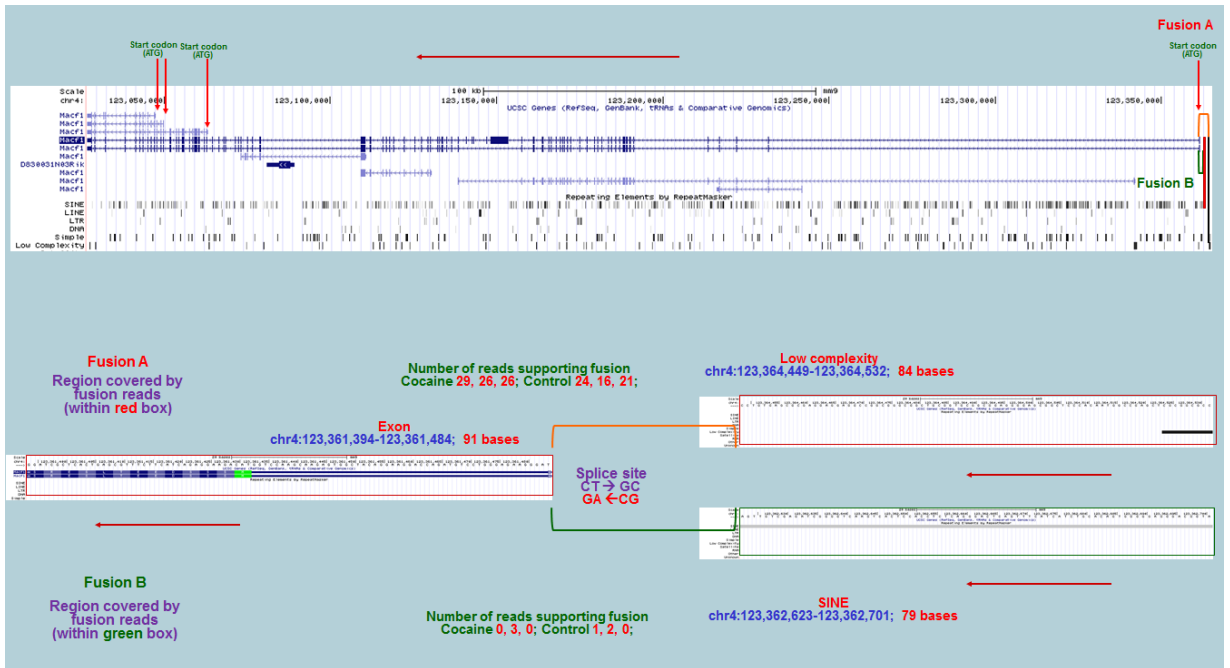

# Ndufs8 fusion with SINE

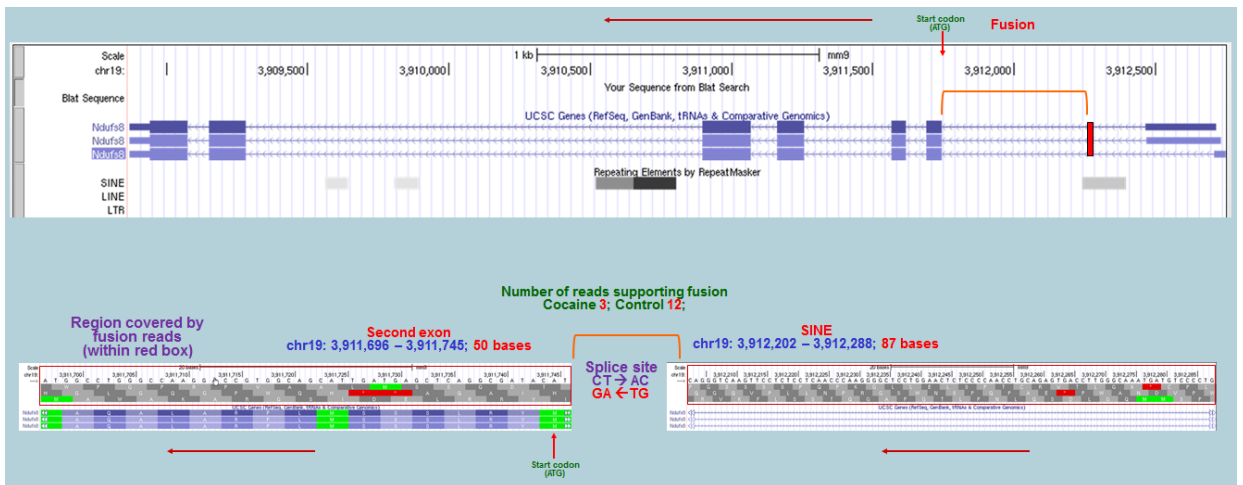

# Orc3 fusions with SINE

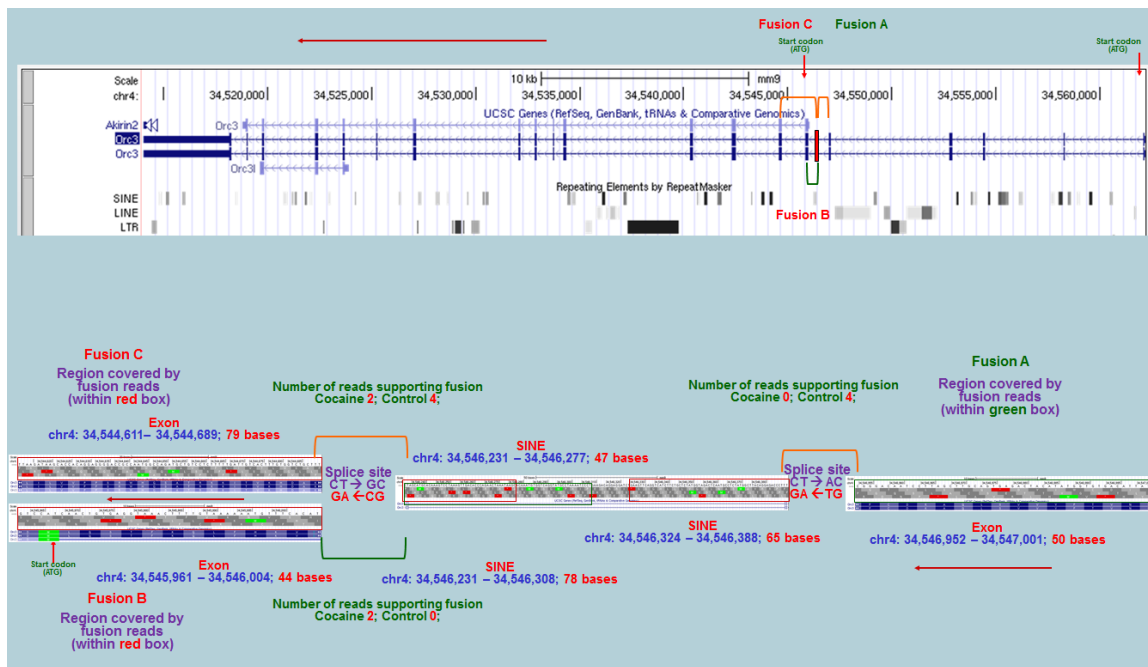

# Slc43a2 fusion with MER1 DNA repeat

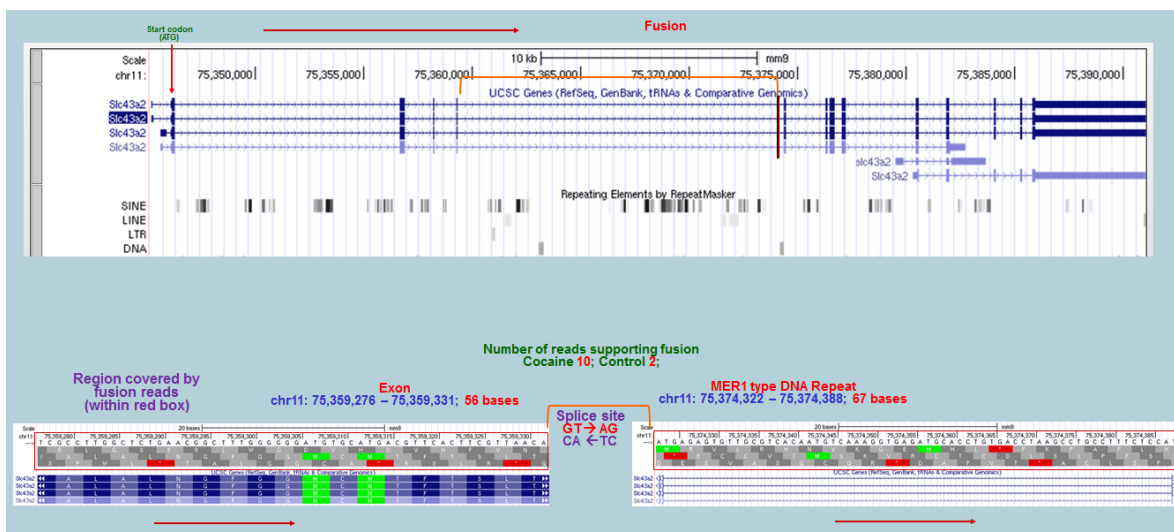

# Srrm2 fusion with SINE

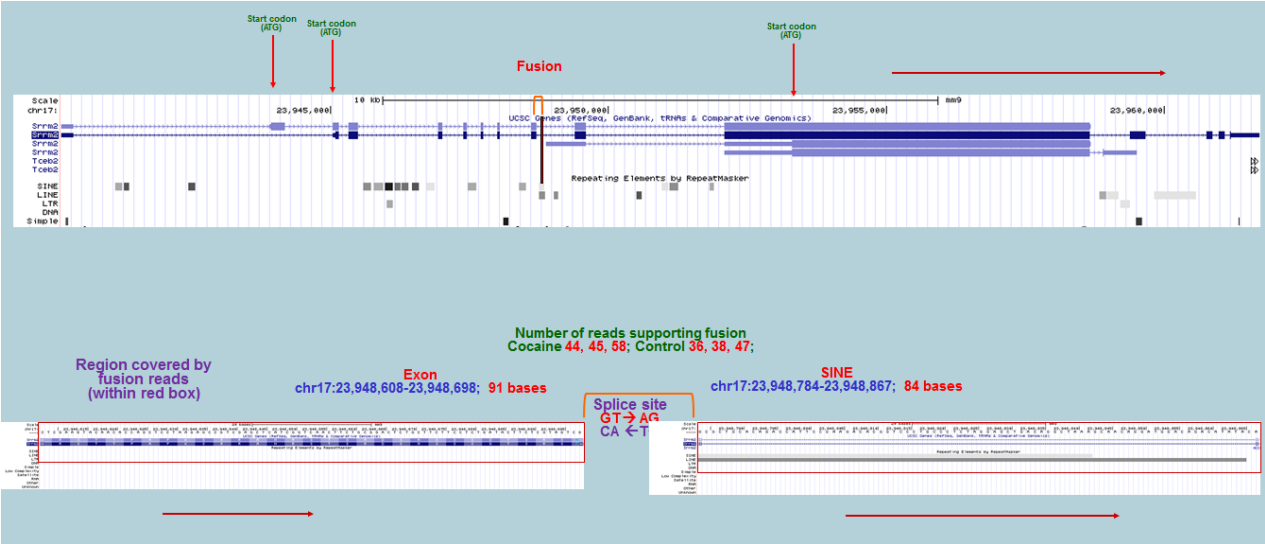

# Timm44 fusions with SINE

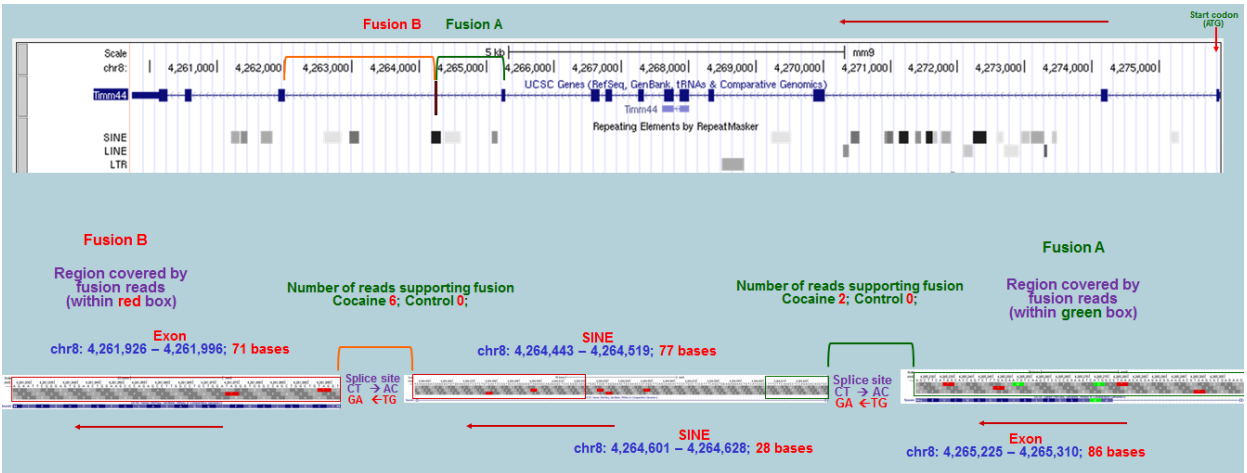

Supplement: pone.0159028.s005.pdf [file pone.0159028.s005.pdf]
