# Supplementary material for: A Novel Analytical Strategy to Identify Fusion Transcripts between Repetitive Elements and Protein Coding-Exons Using RNA-Seq
Source: PubMed Central journal article supplement (PMC4945064; doi:10.1371/journal.pone.0159028), 2016-07-14

# S3 Figure

**A**

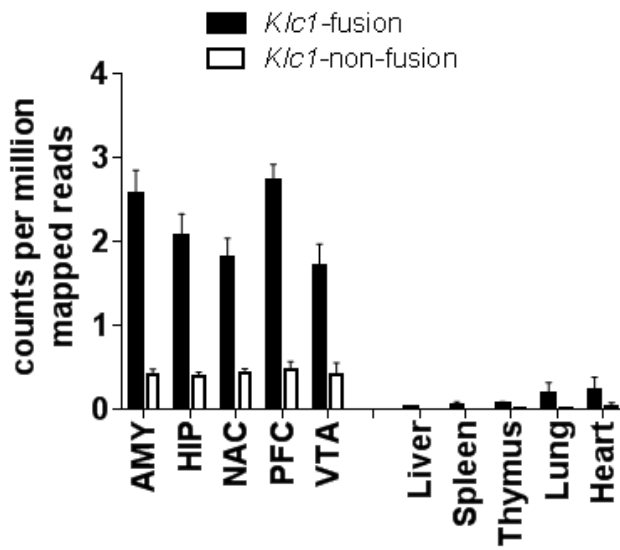

**B**

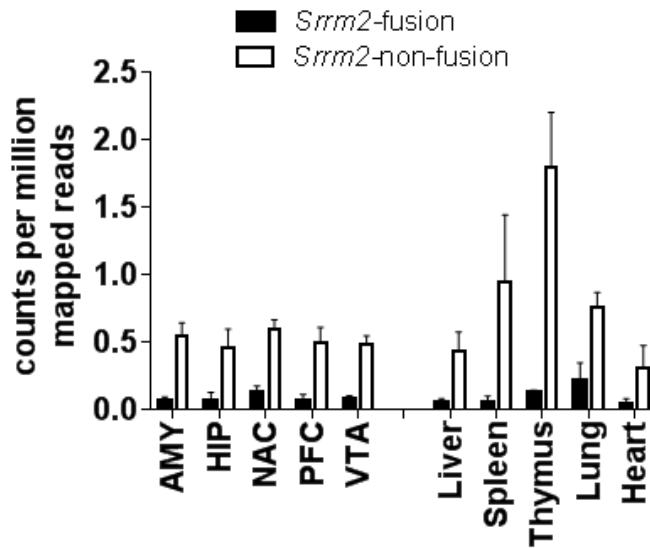

**C**

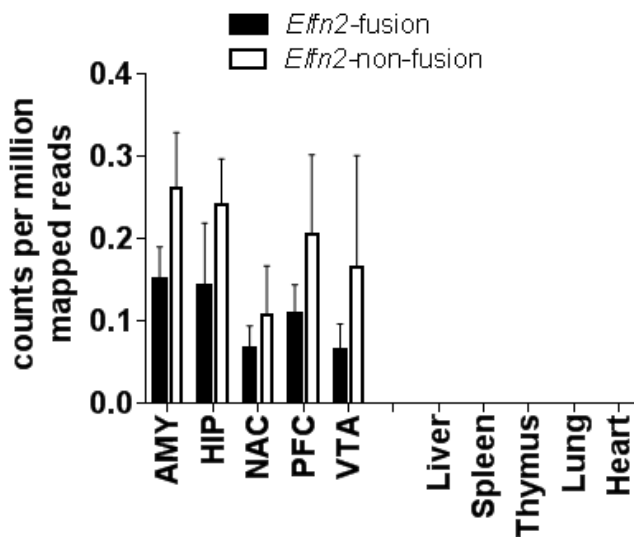

S3 Figure  
D

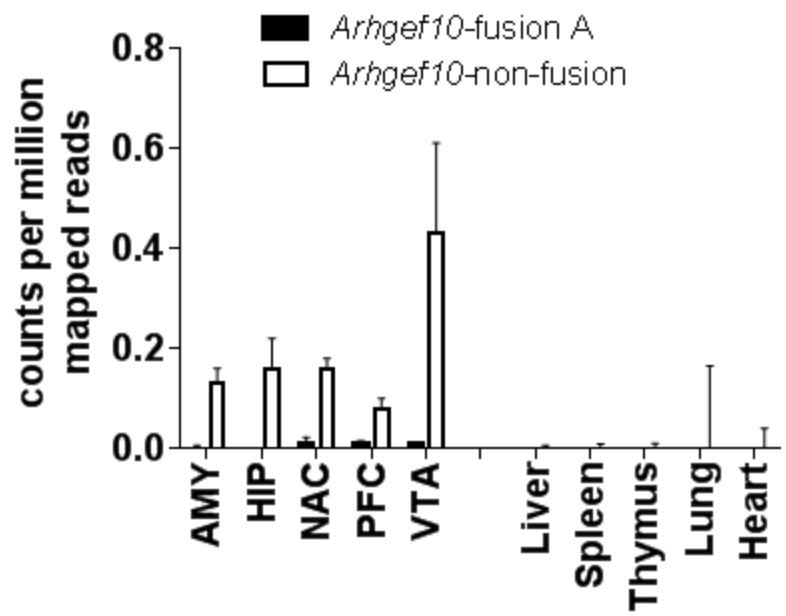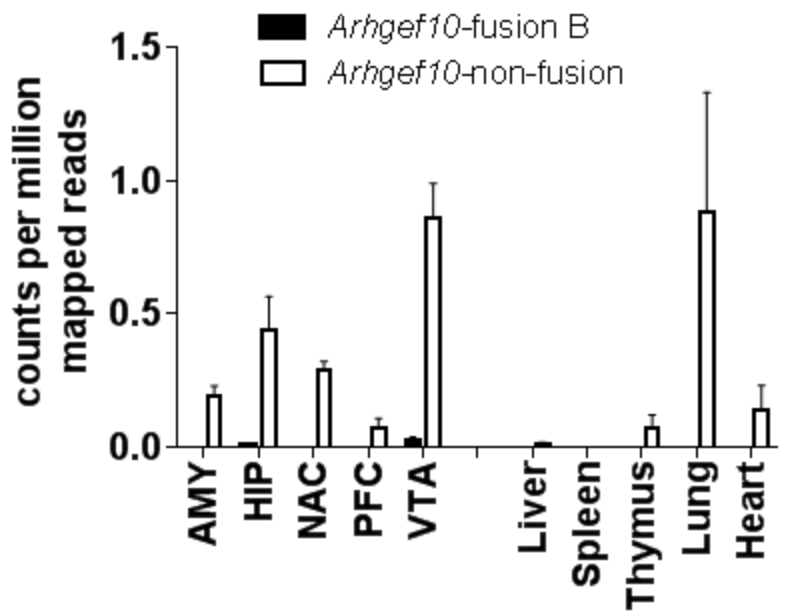

Supplement: pone.0159028.s003.pdf [file pone.0159028.s003.pdf]
