# Supplementary material for: A Novel Analytical Strategy to Identify Fusion Transcripts between Repetitive Elements and Protein Coding-Exons Using RNA-Seq
Source: PubMed Central journal article supplement (PMC4945064; doi:10.1371/journal.pone.0159028), 2016-07-14

# S7 Figure

## SSR coordinates chr10: 98,377,341 - 98,377,427

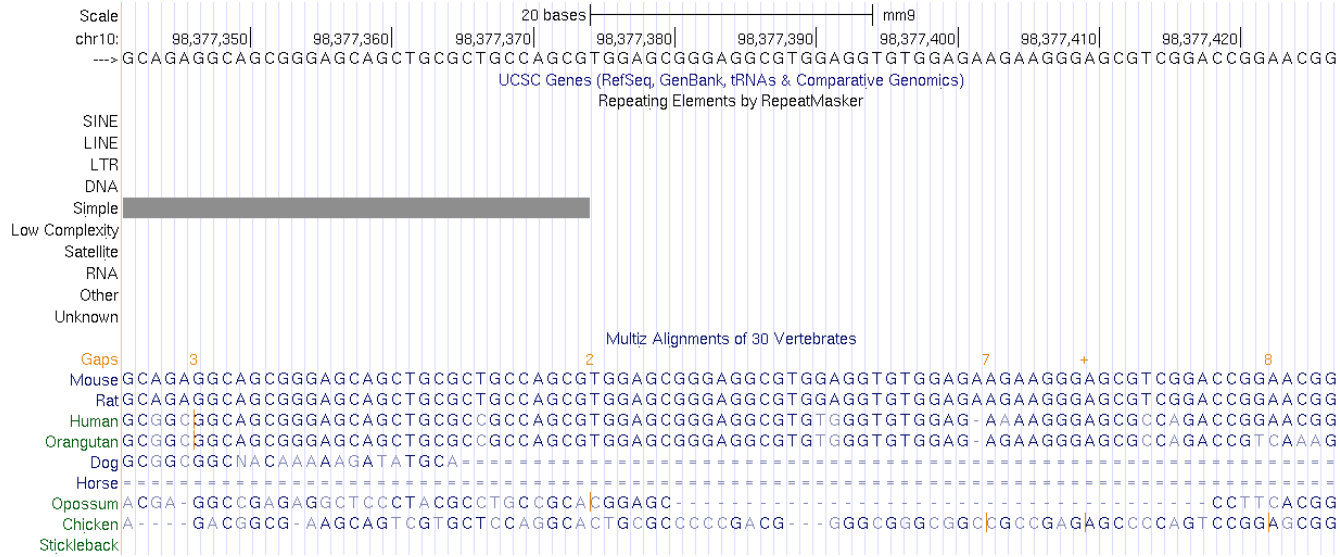

Supplement: pone.0159028.s007.pdf [file pone.0159028.s007.pdf]
