# Supplementary material for: A Novel Analytical Strategy to Identify Fusion Transcripts between Repetitive Elements and Protein Coding-Exons Using RNA-Seq
Source: PubMed Central journal article supplement (PMC4945064; doi:10.1371/journal.pone.0159028), 2016-07-14

# S8 Figure

## SINE coordinates chr5: 52,303,944 - 52,304,006

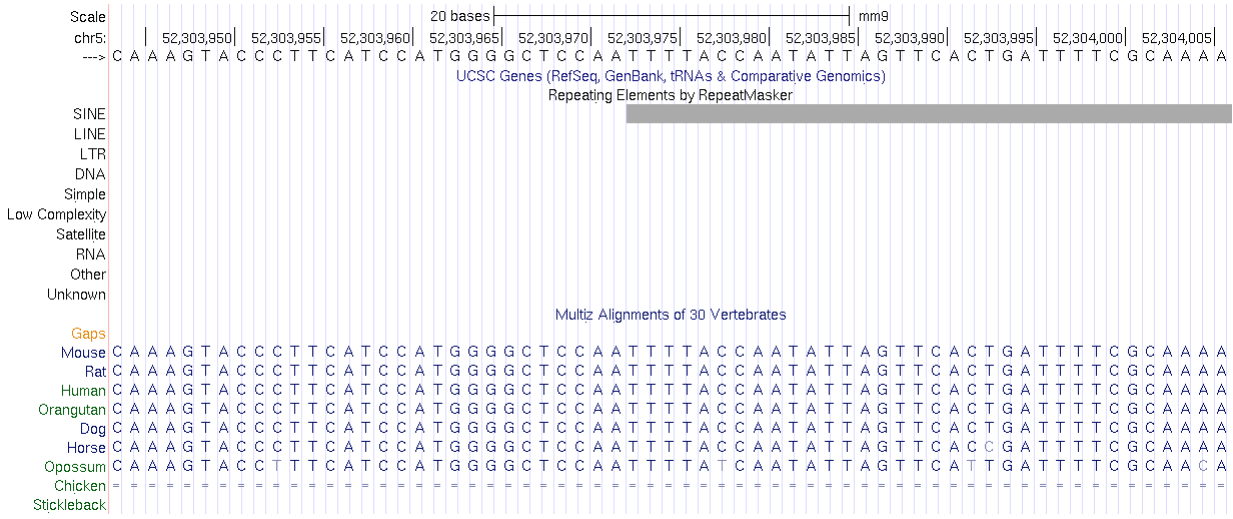

## SSR coordinates Region chr5: 52,506,600 - 52,507,200

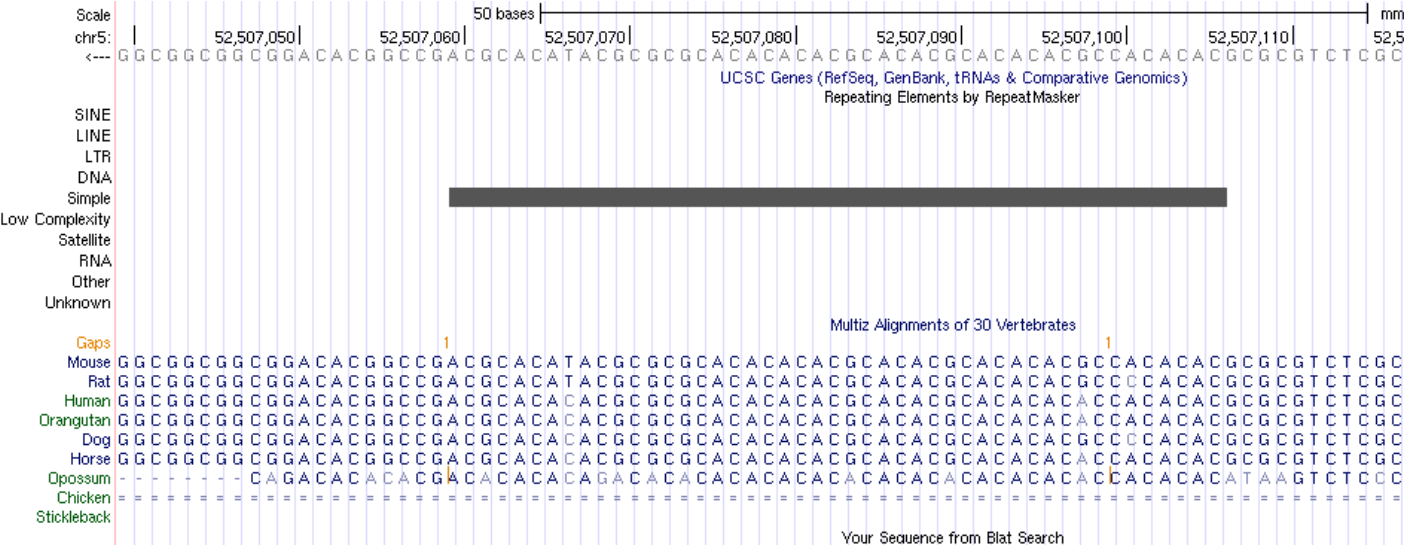

Supplement: pone.0159028.s008.pdf [file pone.0159028.s008.pdf]
